# Supplementary material for: A New Nortriterpenoid, a Sesquiterpene and Hepatoprotective Lignans Isolated from the Fruit of Schisandra chinensis
Source: MDPI journal article supplement (doi:10.3390/molecules22111931), 2017-11-10
Supplement: s1 [file s1]

## Supplementary Information

MS Formula Results: + Scan (6.330 min) Sub (2017030601.d)

| m/z      | Ion                 | Formula        | Abundance |
|----------|---------------------|----------------|-----------|
| 571.2156 | (M+Na) <sup>+</sup> | C28 H36 Na O11 | 16594.6   |

  

| Best | Formula (M)      | Ion Formula         | Score | Cross Sco | Mass     | Calc Mass | Calc m/z | Diff (ppm) | Abs Diff (ppm) | Mass Match | Abund Match | Spacing Match | DRE |
|------|------------------|---------------------|-------|-----------|----------|-----------|----------|------------|----------------|------------|-------------|---------------|-----|
| 1    | C28 H36 O11      | C28 H36 Na O11      | 98.98 |           | 548.2264 | 548.2258  | 571.215  | -1.11      | 1.11           | 99.96      | 98.44       | 97.64         | 11  |
| 2    | C29 H32 N4 O7    | C29 H32 N4 Na O7    | 98.56 |           | 548.2264 | 548.2271  | 571.2163 | 1.31       | 1.31           | 99.94      | 97.1        | 97.52         | 16  |
| 3    | C25 H40 O11 S    | C25 H40 Na O11 S    | 98.09 |           | 548.2264 | 548.2291  | 571.2184 | 5.02       | 5.02           | 99.19      | 99.12       | 94.65         | 6   |
| 4    | C20 H40 N2 O13 S | C20 H40 N2 Na O13 S | 97.6  |           | 548.2264 | 548.2251  | 571.2143 | -2.33      | 2.33           | 99.83      | 96.76       | 94.15         | 2   |
| 5    | C32 H36 O6 S     | C32 H36 Na O6 S     | 97.5  |           | 548.2264 | 548.2233  | 571.2125 | -5.69      | 5.69           | 98.96      | 96.97       | 95.23         | 15  |
| 6    | C33 H32 N4 O2 S  | C33 H32 N4 Na O2 S  | 97.29 |           | 548.2264 | 548.2245  | 571.2138 | -3.26      | 3.26           | 99.66      | 95.14       | 95.12         | 20  |
| 7    | C29 H40 O6 S2    | C29 H40 Na O6 S2    | 97.19 |           | 548.2264 | 548.2266  | 571.2159 | 0.45       | 0.45           | 99.99      | 95.61       | 93.49         | 10  |
| 8    | C30 H36 N4 O2 S2 | C30 H36 N4 Na O2 S2 | 96.89 |           | 548.2264 | 548.229   | 571.2172 | 2.89       | 2.89           | 99.73      | 95.04       | 93.37         | 15  |
| 9    | C38 H32 N2 S     | C38 H32 N2 Na S     | 95.95 |           | 548.2264 | 548.2286  | 571.2178 | 4.08       | 4.08           | 99.46      | 90.38       | 95.62         | 24  |
| 10   | C41 H28 N2       | C41 H28 N2 Na       | 95.28 |           | 548.2264 | 548.2252  | 571.2145 | -2.06      | 2.06           | 99.86      | 85.43       | 97.94         | 29  |

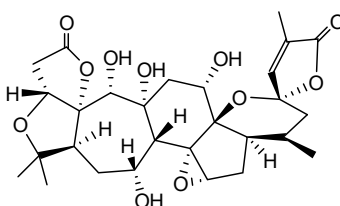

Figure S1. HRESIMS spectrum of 19(*R*)-hydroxyl-wuweizidilactone H (1)

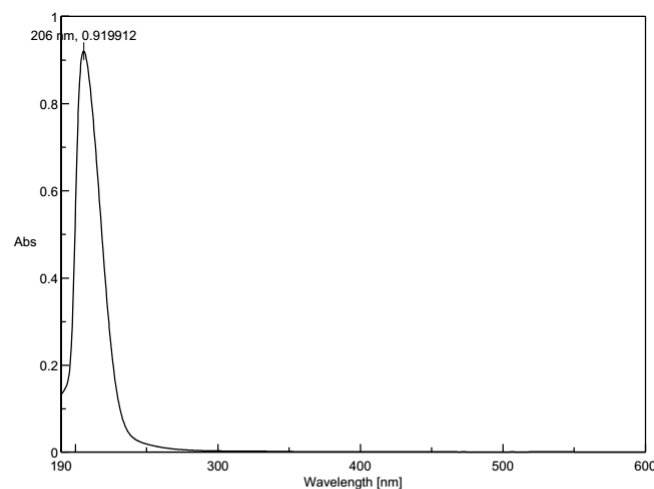

[Comment]  
Sample Name sc-4-123-2  
Comment 0.05  
User  
Division UV  
Measurement Information  
Instrument Name V-650  
Model Name V-650  
Serial No. A034461150

Accessory PSC-718  
Accessory S/N A001761114  
Position 1  
Cell Length 10 mm  
Temperature 19.93 C  
Control Sensor Holder  
Monitor Sensor Holder  
Start Mode Start immediately

Photometric Mode Abs  
Measurement range 600 - 190 nm  
Data pitch 0.2 nm  
Band width(UV/Vis) 2.0 nm  
Response Medium  
Scanning speed 200 nm/min  
Source Change 340 nm  
Light Source D2/VI  
Filter Exchange Step  
Correction Baseline

[Data Information]  
Creation Date 2017-3-7 17:18  
Data array type Linear data array  
Horizontal Wavelength [nm]  
Vertical Abs  
Start 600 nm  
End 190 nm  
Data pitch 0.2 nm  
Data points 2051

Memory-4

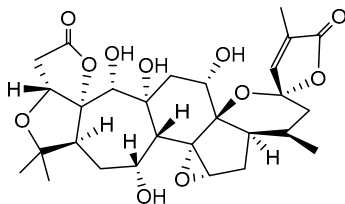

Figure S2. UV spectrum of 19(R)-hydroxyl-wuweizidilactone H (1)

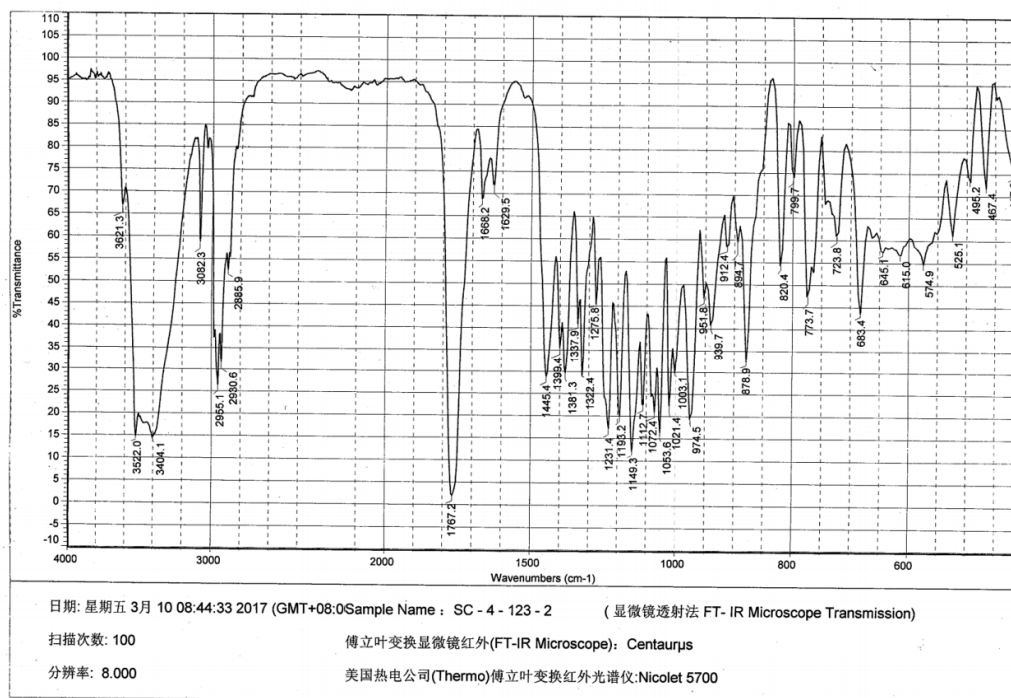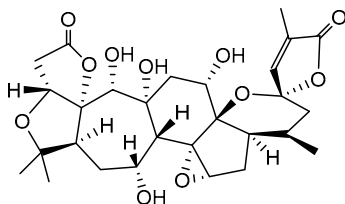

Figure S3. IR spectrum of 19(R)-hydroxyl-wuweizidilactone H (1)

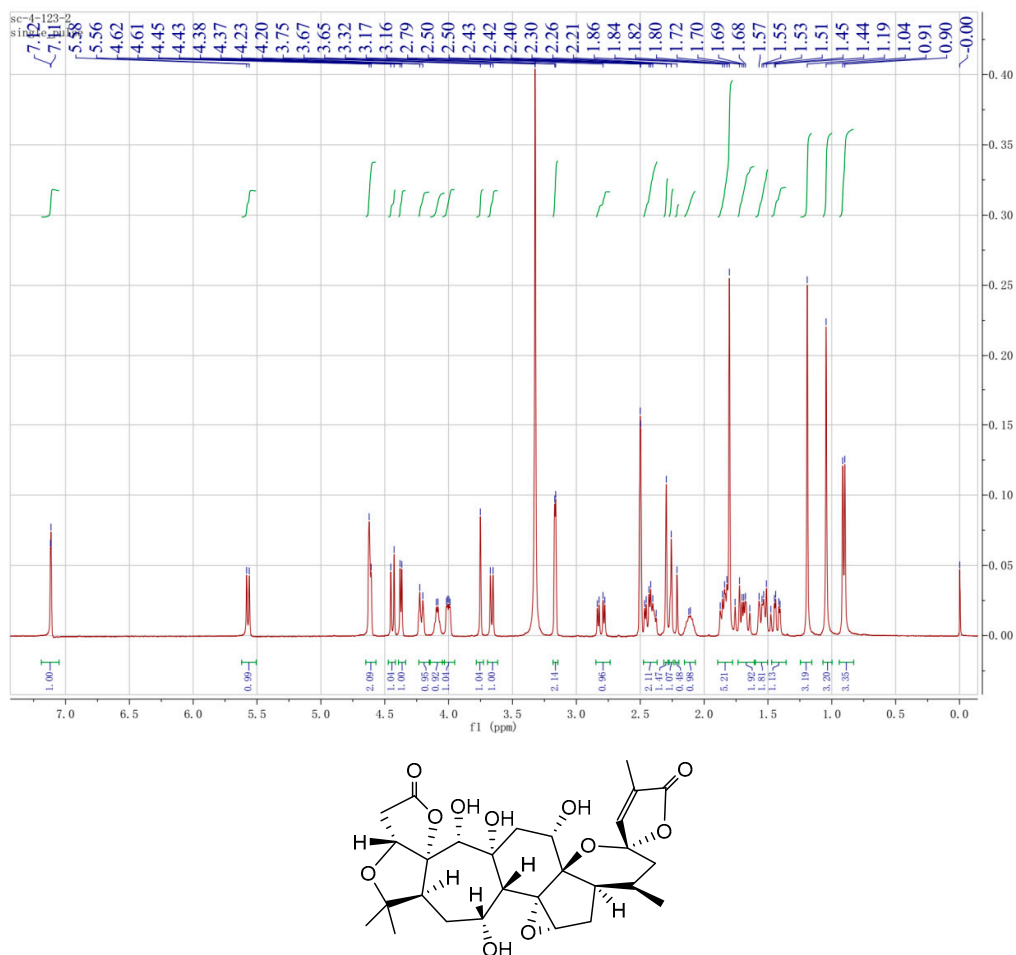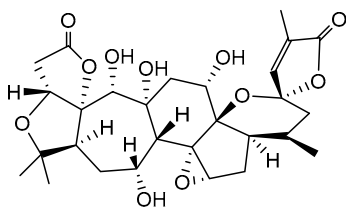

**Figure S4.** <sup>1</sup>H NMR spectrum of 19(R)-hydroxyl-wuweizidilactone H (1; 600 MHz, DMSO-*d*<sub>6</sub>)

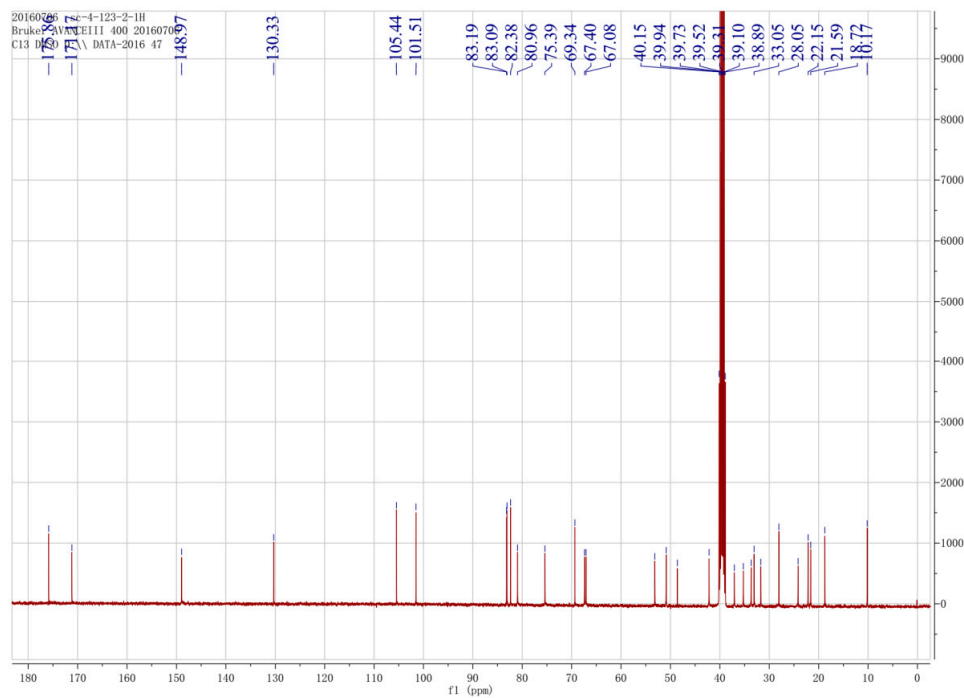

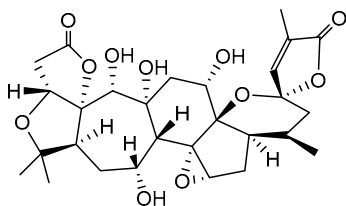

**Figure S5.**  $^{13}\text{C}$  NMR spectrum of 19(*R*)-hydroxyl-wuweizidilactone H (1; 150 MHz,  $\text{DMSO}-d_6$ )

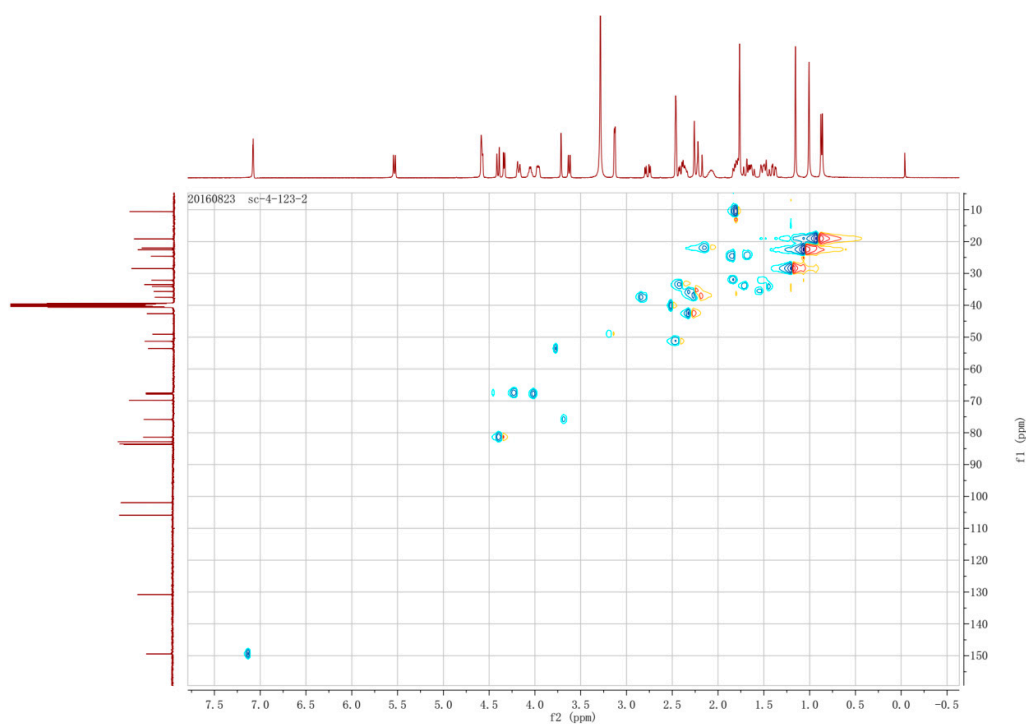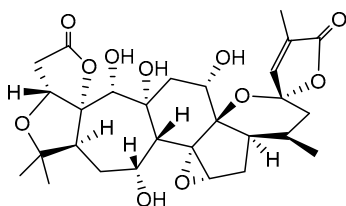

**Figure S6.** HSQC spectrum of 19(*R*)-hydroxyl-wuweizidilactone H (1;  $\text{DMSO}-d_6$ )

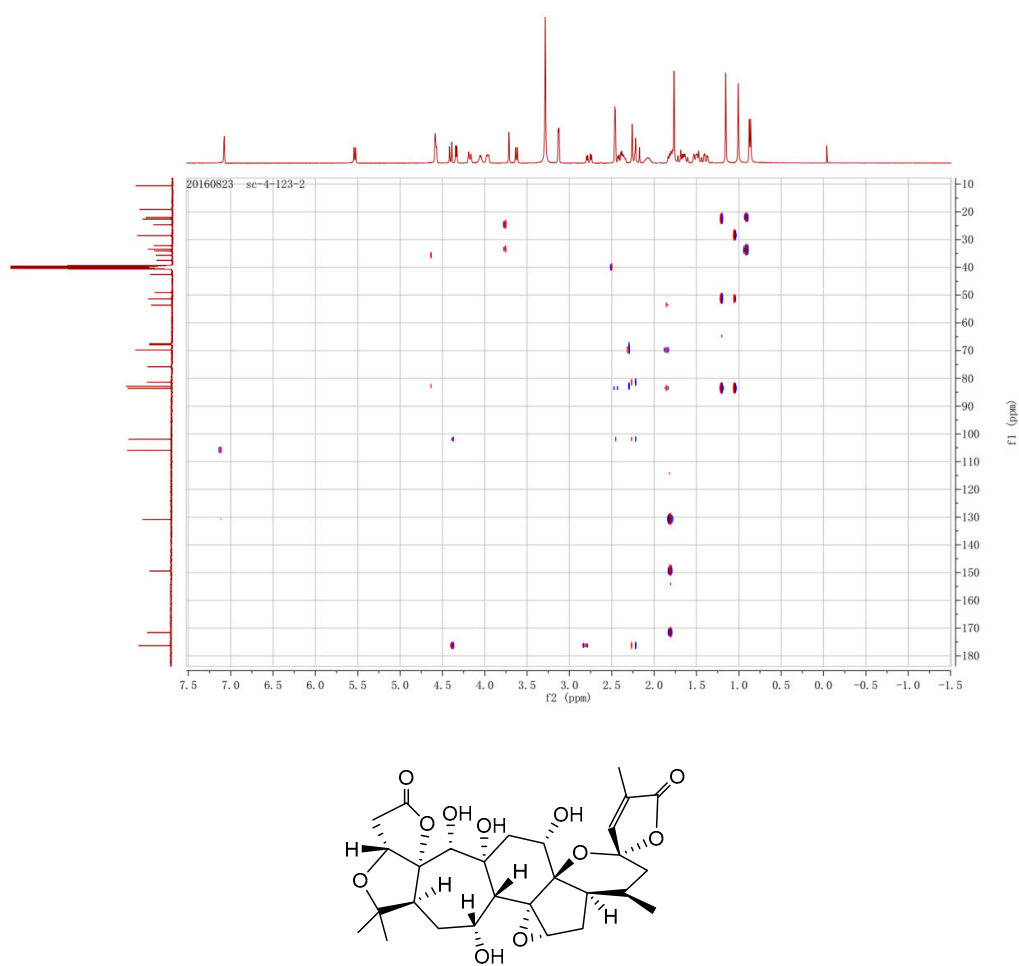

**Figure S7.** HMBC spectrum of 19(R)-hydroxyl-wuweizidilactone H (1; DMSO-*d*<sub>6</sub>)

VNU-600 NMR510 ao-4-123-2 IN dmsd Oct 11 2017

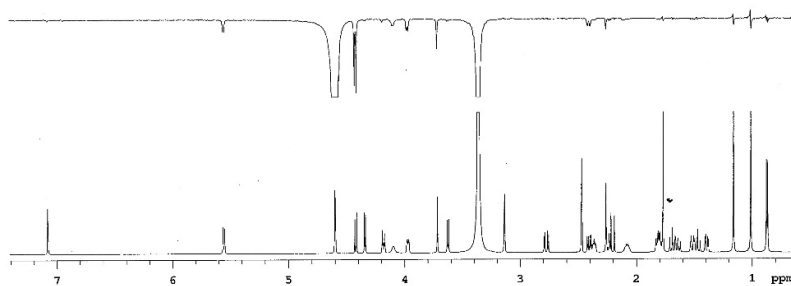

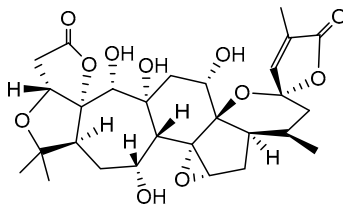

**Figure S8.** 1D NOSEY spectrum of 19(*R*)-hydroxyl-wuweizidilactone H (1; DMSO-*d*<sub>6</sub>)

MS Formula Results: - Scan (8.364 min) Sub (2017031602.d)

| m/z      | Ion                | Formula    | Abundance |
|----------|--------------------|------------|-----------|
| 233.1542 | (M-H) <sup>-</sup> | C15 H21 O2 | 76161.7   |

  

| Best | Formula (M)   | Ion Formula   | Score | Cross Sco | Mass     | Calc Mass | Calc m/z | Diff (ppm) | Abs Diff (ppm) | Mass Match | Abund Match | Spacing Match | DBE |
|------|---------------|---------------|-------|-----------|----------|-----------|----------|------------|----------------|------------|-------------|---------------|-----|
| ✓    | C15 H22 O2    | C15 H21 O2    | 99.77 |           | 234.1615 | 234.162   | 233.1547 | 2.16       | 2.16           | 99.86      | 99.49       | 99.93         | 5   |
| ✓    | C10 H22 N2 O4 | C10 H21 N2 O4 | 96.64 |           | 234.1615 | 234.158   | 233.1507 | -15.02     | 15.02          | 93.58      | 98.95       | 100           | 1   |
| ✓    | C12 H26 O2 S  | C12 H25 O2 S  | 95.4  |           | 234.1615 | 234.1654  | 233.1581 | 16.55      | 16.55          | 92.26      | 97.09       | 99.64         | 0   |
| ✓    | C9 H22 N4 O3  | C9 H21 N4 O3  | 86.58 |           | 234.1615 | 234.1692  | 233.1619 | 32.94      | 32.94          | 72.69      | 98.61       | 99.93         | -1  |
| ✓    | C9 H22 N4 O S | C9 H21 N4 O S | 78.98 |           | 234.1615 | 234.1514  | 233.1442 | -42.9      | 42.9           | 58.22      | 96.54       | 99.42         | 1   |
| ✓    | C14 H22 N2 O  | C14 H21 N2 O  | 75.02 |           | 234.1615 | 234.1732  | 233.1659 | 50.13      | 50.13          | 47.78      | 99.63       | 99.99         | 5   |
| ✓    | C12 H18 N4 O  | C12 H17 N4 O  | 70.5  |           | 234.1615 | 234.1481  | 233.1408 | -57.29     | 57.29          | 38.11      | 99.94       | 99.98         | 6   |

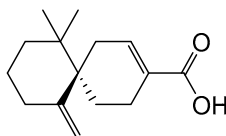

**Figure S9.** HRESIMS spectrum of (6*R*)-β-chamigrenic acid (2)

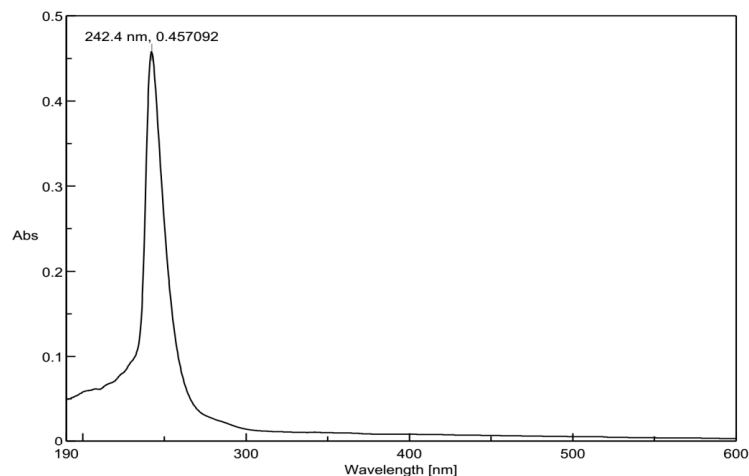

[Comment]  
 Sample Name sc-4-27-30  
 Comment 0.025  
 User  
 Division UV  
 Configuration 324  
 Instrument Name V-650  
 Model Name V-650  
 Serial No. A034461150

Accessory PSC-718  
 Accessory S/N A001761114  
 Position 1  
 Cell Length 10 mm  
 Temperature 19.97 C  
 Control Sensor Holder  
 Monitor Sensor Holder  
 Start Mode Start immediately

Photometric Mode Abs  
 Measurement range 600 - 190 nm  
 Data pitch 0.2 nm  
 Band width(UV/Vis) 2.0 nm  
 Response Medium  
 Scanning speed 200 nm/min  
 Source Change 340 nm  
 Light Source D2/WI  
 Filter Exchange Step  
 Correction Baseline

[Data Information]  
 Creation Date 2017-7-4 16:36  
 Data array type Linear data array  
 Horizontal Wavelength [nm]  
 Vertical Abs  
 Start 600 nm  
 End 190 nm  
 Data pitch 0.2 nm  
 Data points 2051

Memory-1

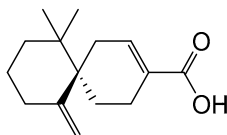**Figure S10.** UV spectrum of (6*R*)- $\beta$ -chamigrenic acid (2)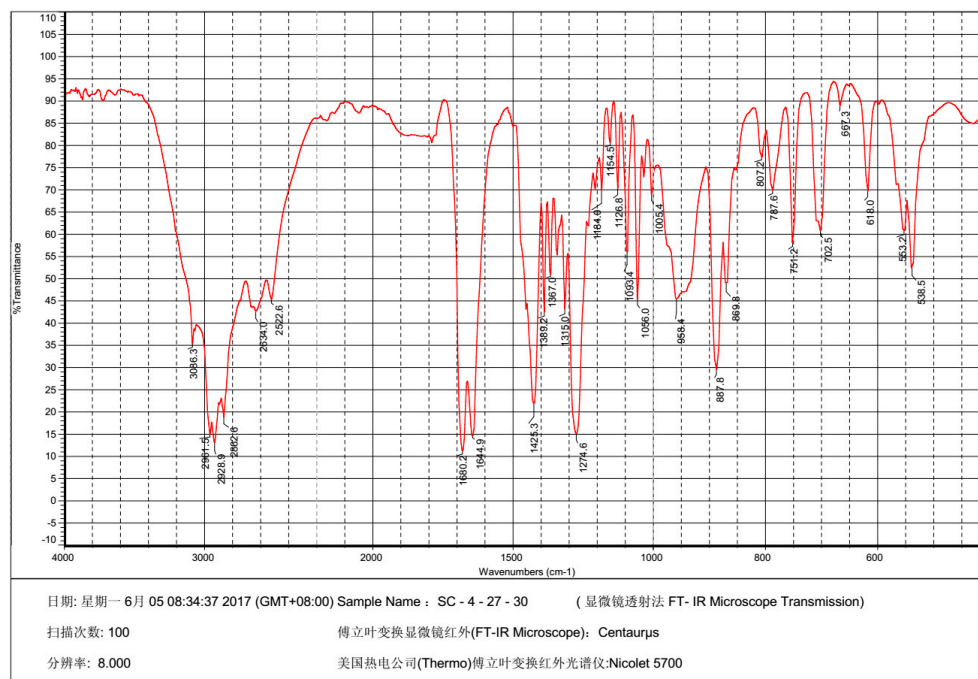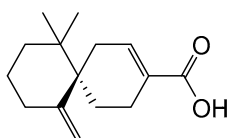**Figure S11.** IR spectrum of (6*R*)- $\beta$ -chamigrenic acid (2)

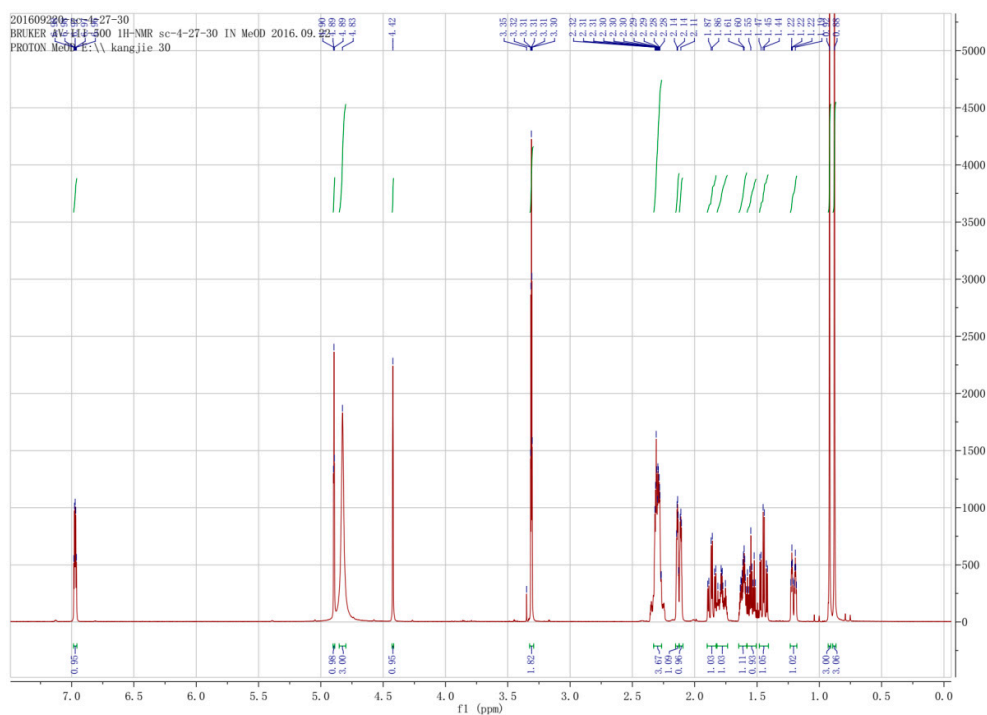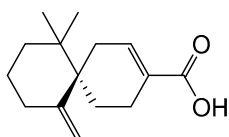

**Figure S12.**  $^1\text{H}$  NMR spectrum of (6*R*)- $\beta$ -chamigrenic acid (2; 600 MHz,  $\text{CD}_3\text{OD}$ )

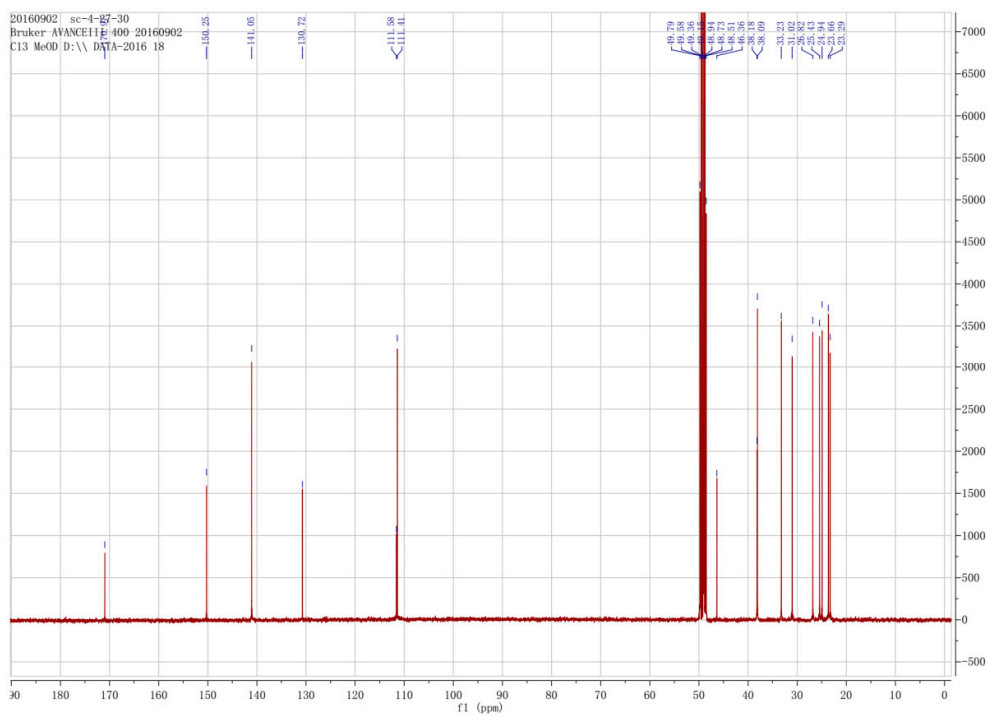



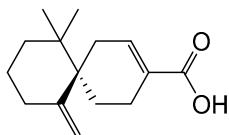

**Figure S13.**  $^{13}\text{C}$  NMR spectrum of (6*R*)- $\beta$ -chamigrenic acid (2; 150 MHz,  $\text{CD}_3\text{OD}$ )

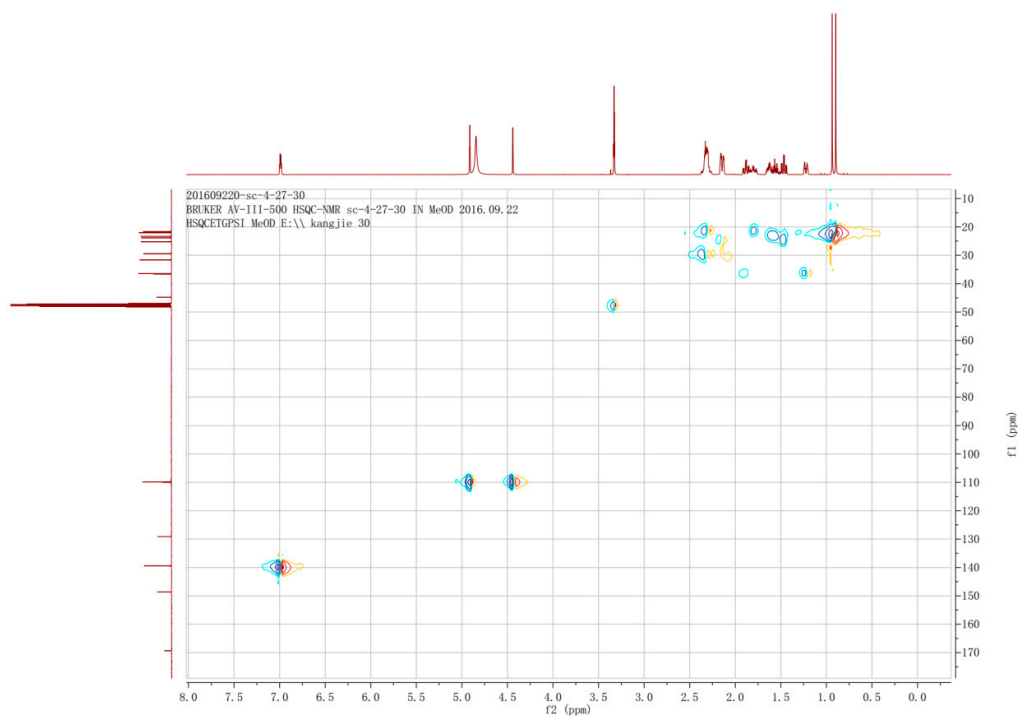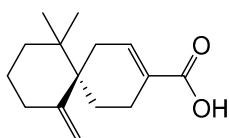

**Figure S14.** HSQC spectrum of (6*R*)- $\beta$ -chamigrenic acid (2;  $\text{CD}_3\text{OD}$ )

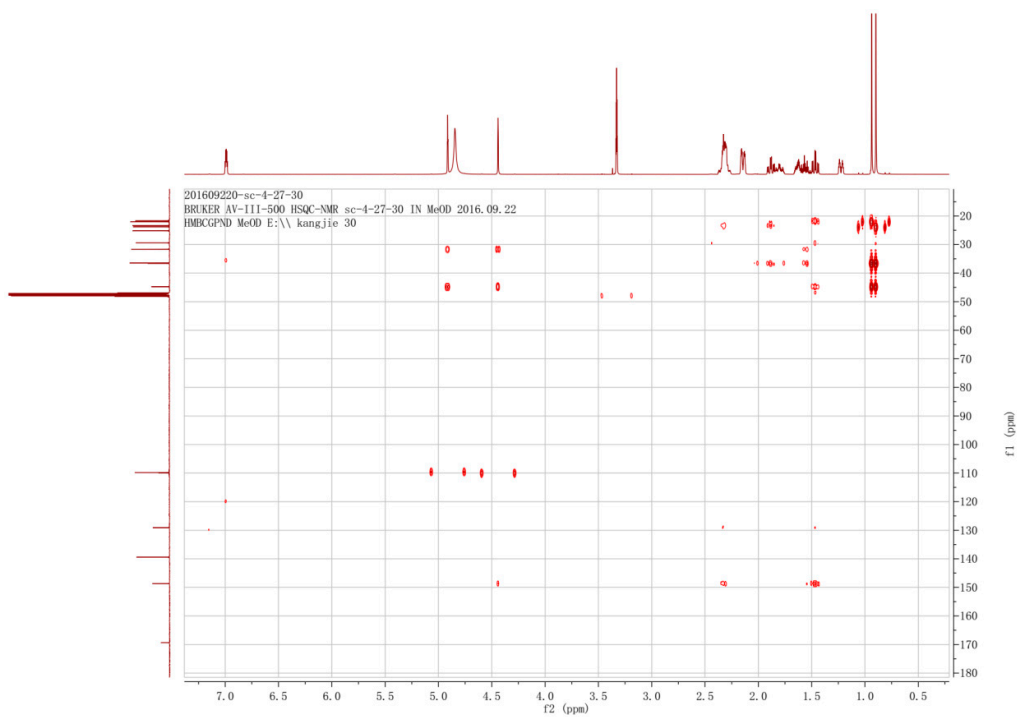

**Figure S15.** HMBC spectrum of (6*R*)-β-chamigrenic acid (2; CD<sub>3</sub>OD)
